# Supplementary material for: Aqueous electrosynthesis of silver indium selenide nanocrystals and their photothermal properties
Source: Royal Society of Chemistry journal article supplement (doi:10.1039/c9gc03647d), 2020-01-01
Supplement: c9gc03647d1.pdf [file c9gc03647d1.pdf]

## Supplementary information

### Aqueous electrosynthesis of silver indium selenide nanocrystals and photothermal properties

Felipe L. N. Sousa,<sup>a</sup> Anderson J. Caires,<sup>b</sup> Brenand A. Souza,<sup>a</sup> Walter M. Azevedo,<sup>a</sup> Herman S. Mansur,<sup>b</sup> Denilson V. Freitas,<sup>a</sup> Marcelo Navarro<sup>a\*</sup>

<sup>a</sup>Departamento de Química Fundamental, Universidade Federal de Pernambuco, Cidade Universitária, 50670-901 Recife, PE, Brazil.

<sup>b</sup>Departamento de Engenharia Metalúrgica e Materiais, Universidade Federal de Minas Gerais, 31270-901 Belo Horizonte, MG, Brazil.

\*e-mail: [navarro@ufpe.br](mailto:navarro@ufpe.br)

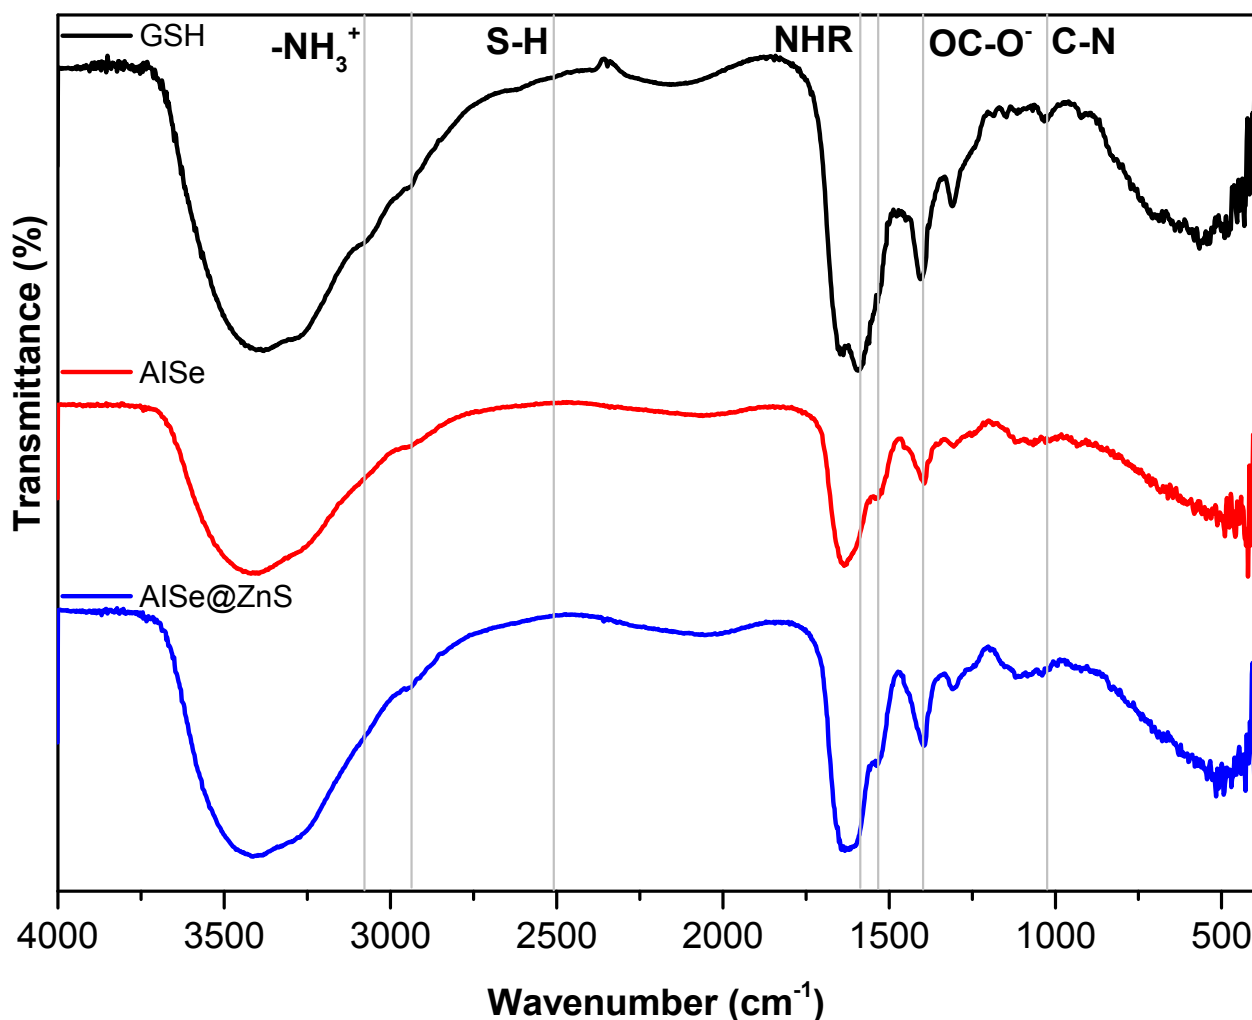

**Figure S1.** FTIR spectra of GSH, AISe and AISe/ZnS systems at pH 9.

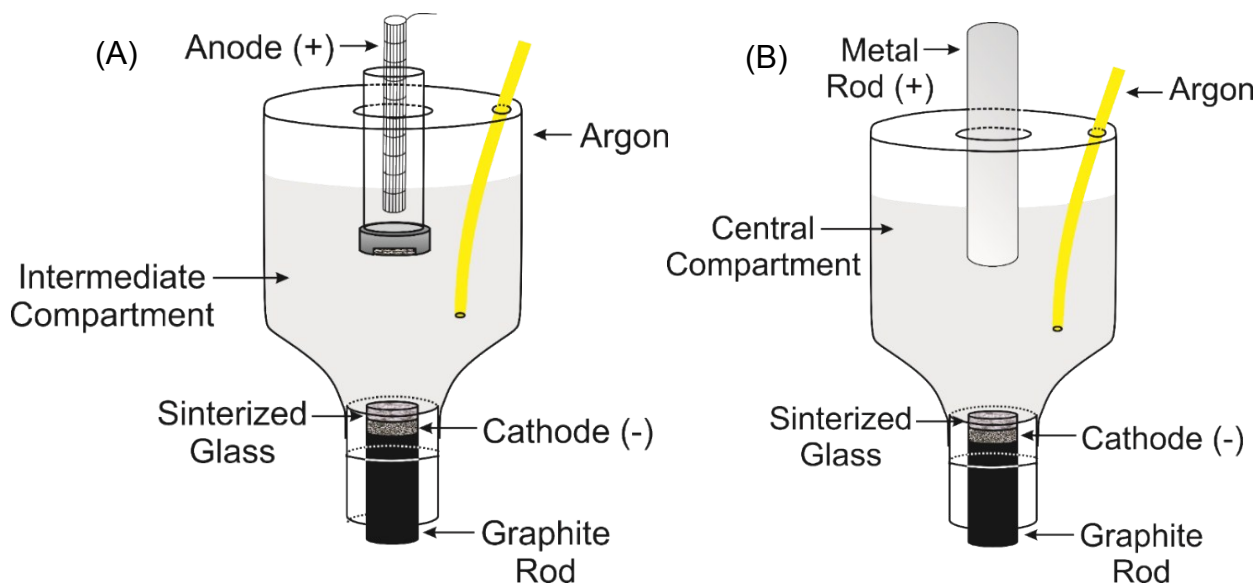

**Figure S2:** Electrochemical cell used for the synthesis of (A) AISe-GSH and (B) ZnS-GSH NCs (adapted from references 1 and 2).

**Table S1.** Emission wavelength and QY of AISe NCs synthesized by different methods.

| entry | Strategy / Medium                      | Stabilizer                   | Chalcogen source                    | $\lambda_{em}$ | QY (%)      | Standard/ $\lambda_{exc}$ | Ref.                 |
|-------|----------------------------------------|------------------------------|-------------------------------------|----------------|-------------|---------------------------|----------------------|
| 1     | Hot injection<br>(n-trioctylphosphine) | n-trioctylphosphine          | Se <sup>0</sup>                     | 700 – 850 nm   | < 5.0       | -                         | [1]                  |
| 2     | Hot injection<br>(1-octadecene)        | Oleylamine/<br>dodecanethiol | Se <sup>0</sup>                     | 619 nm         | 6.9         | R101/450 nm               | [2]                  |
| 3     | Hot injection<br>(aqueous)             | L-GSH                        | Se <sup>0</sup> /NaBH <sub>4</sub>  | 642 nm         | 10.3        | R6G / 382 nm              | [3]                  |
| 4     | Hydrothermal<br>(aqueous)              | Gelatine/TGA                 | Se <sup>0</sup> /NaBH <sub>4</sub>  | 575 – 650 nm   | < 5.0       | Integrating<br>sphere     | [4]                  |
| 5     | <b>Electrochemical<br/>(aqueous)</b>   | <b>L-GSH</b>                 | <b>Se<sup>0</sup></b>               | <b>610 nm</b>  | <b>18.6</b> | <b>R6G / 488 nm</b>       | <b>This<br/>work</b> |
| 6     | <b>Electrochemical<br/>(aqueous)</b>   | <b>L-GSH</b>                 | <b>Se<sup>0</sup>/S<sup>0</sup></b> | <b>634 nm</b>  | <b>16.0</b> | <b>R6G / 488 nm</b>       | <b>This<br/>work</b> |

## References

- 1 O. Yarema, M. Yarema, D. Bozyigit, W. M. M. Lin and V. Wood, *ACS Nano*, 2015, **9**, 11134–11142.
- 2 D. Yao, H. Liu, Y. Liu, C. Dong, K. Zhang, Y. Sheng, J. Cui, H. Zhang and B. Yang,

*Nanoscale*, 2015, **7**, 18570–18578.

- 3 D. Che, X. Zhu, H. Wang, Y. Duan, Q. Zhang and Y. Li, *J. Colloid Interface Sci.*, 2016, **463**, 1–7.
- 4 X. Kang, Y. Yang, L. Huang, Y. Tao, L. Wang and D. Pan, *Green Chem.*, 2015, **17**, 4482–4488.
